# Supplementary material for: A New Cryptic Lineage in Parmeliaceae (Ascomycota) with Pharmacological Properties
Source: MDPI journal article supplement (doi:10.3390/jof8080826), 2022-08-08
Supplement: s1 [file s1]

Table S1. Specimens of *Canoparmelia* used in this study, including sample code, collection details, voucher and GenBank Accession numbers. Newly obtained sequences for this study are in bold and missing data are indicated with a dash (—).

| Taxon label                                     | Locality                                                         | Collector(s)      | Voucher specimen | GenBank Accession numbers |                 |                 |
|-------------------------------------------------|------------------------------------------------------------------|-------------------|------------------|---------------------------|-----------------|-----------------|
|                                                 |                                                                  |                   |                  | nuITS                     | mtSSU           | nuLSU           |
| 2301_ <i>Canoparmelia austroamericana</i>       | Argentina                                                        | Michlig & Niveiro | Michlig 2301     | KY929408                  | -               | -               |
| 6515_ <i>Canoparmelia</i> cf. <i>concrecens</i> | Kenya: West Pokot County, Kapenguria                             | Kirika, 5233A     | EA               | <b>OP046386</b>           | -               | <b>OP046382</b> |
| 4688_ <i>Canoparmelia amabilis</i>              | Portugal: Azores Island, San Jorge, Fgada das Cubres,            | Divakar 4688      | MAF-Lich 24553   | <b>OP046387</b>           | <b>OP046401</b> | <b>OP046383</b> |
| 4682_ <i>Canoparmelia amabilis</i>              | Portugal: Azores Island, San Jorge, Parque Sete Fontes,          | Divakar 4682      | MAF-Lich 24554   | <b>OP046388</b>           | -               | -               |
| 1_ <i>Canoparmelia caroliniana</i>              | USA: North Carolina                                              | Perlmutter 1000   | NCU              | GU994542                  | AY584613        | GU994584        |
| 25_ <i>Canoparmelia caroliniana</i>             | USA                                                              | AFTOL-ID 6        | NCU              | -                         | -               | AY584634        |
| 4680_ <i>Canoparmelia caroliniana</i>           | Portugal: Azores Island, San Jorge, Fgada das Cubres,            | Divakar 4680      | MAF-Lich 24555   | <b>OP046389</b>           | -               | <b>OP046384</b> |
| 2_ <i>Canoparmelia caroliniana</i>              | Kenya: Kakamega County, Kakamega forest, Isecheno Forest Station | Kirika, 3419      | EA, F            | KX369243                  | -               | KX369261        |
| 3_ <i>Canoparmelia caroliniana</i>              | Kenya: Kakamega County, Kakamega forest, Buyangu,                | Kirika, 3389      | EA, F            | KX369244                  | KX369256        | KX369262        |

|                                           |                                                                             |                                             |                       |                 |                 |                 |
|-------------------------------------------|-----------------------------------------------------------------------------|---------------------------------------------|-----------------------|-----------------|-----------------|-----------------|
|                                           | Edeos<br>Campsite                                                           |                                             |                       |                 |                 |                 |
| 9_ <i>Canoparmelia<br/>concrescens</i>    | Kenya:<br>Kakamega<br>County                                                | Divakar,<br>Mangold<br>& Lumbsch<br>19538f  | MAF-<br>Lich<br>15547 | GU994543        | KR995317        | GU994585        |
| 6545_ <i>Canoparmelia<br/>texana</i>      | Kenya:<br>Kakamega<br>County,<br>Lirondo<br>Hill                            | Kirika, 5232                                | EA, MAF               | OK561343        | OK582193        | OK561867        |
| 5_ <i>Canoparmelia<br/>ecaperata</i>      | Kenya:<br>Makueni<br>County                                                 | Kirika,<br>Malombe<br>& Matheka,<br>3692    | EA, F                 | KX369246        | -               | KX369264        |
| 6_ <i>Canoparmelia<br/>eruptens</i>       | Kenya:<br>Taita<br>Taveta<br>County,<br>Ngangao<br>Forest                   | Kirika,<br>Mugambi<br>&<br>Lumbsch,<br>2405 | EA, F                 | KX369247        | -               |                 |
| 7_ <i>Canoparmelia<br/>eruptens</i>       | Kenya:<br>Taita<br>Taveta<br>County,<br>Ngangao<br>Hill                     | Kirika, 4483                                | EA, F,<br>MAF         | KX369248        | KX369257        | KX369265        |
| 12_ <i>Canoparmelia<br/>nairobiensis</i>  | Kenya:<br>Kitui<br>County,<br>Mwingi,<br>Nuu Hill                           | Kirika &<br>Lumbsch,<br>3866                | EA,<br>MAF, F         | GU994545        | KR995318        | KX369268        |
| 13_ <i>Canoparmelia<br/>nairobiensis</i>  | Kenya:<br>Nyeri<br>County,<br>Mt. Kenya,<br>Gathiuru<br>Forest,<br>Naromoru | Kirika, 4423                                | EA,<br>MAF, F         | KX369252        | KX369259        | KX369269        |
| 16_ <i>Canoparmelia<br/>texana</i>        | India:<br>Uttaranchal                                                       | Divakar<br>GPGC 02-<br>000637               | MAF-<br>Lich<br>14272 | EF042906        | -               | EF042915        |
| 6518_ <i>Canoparmelia<br/>texana</i>      | Kenya:<br>Kakamega<br>County,<br>Lirondo<br>Hill                            | Kirika,<br>5232A                            | EA, MAF               | <b>OP046390</b> | <b>OP046402</b> | <b>OP046385</b> |
| 18_ <i>Xanthoparmelia<br/>chlorochroa</i> | USA:<br>North<br>Dakota                                                     | Leavitt<br>55437                            | BRY-C                 | HM578887        | KR995372        | HM579298        |

|                                               |                  |                            |                      |          |          |          |
|-----------------------------------------------|------------------|----------------------------|----------------------|----------|----------|----------|
| 19_ <i>Xanthoparmelia</i><br><i>conspersa</i> | Spain:<br>Zamora | Blanco &<br>Crespo<br>s.n. | MAF-<br>Lich<br>6793 | AY581096 | AF351186 | AY578962 |
|-----------------------------------------------|------------------|----------------------------|----------------------|----------|----------|----------|
