# Supplementary material for: A New Cryptic Lineage in Parmeliaceae (Ascomycota) with Pharmacological Properties
Source: MDPI journal article supplement (doi:10.3390/jof8080826), 2022-08-08
Supplement: s1 [file s1]

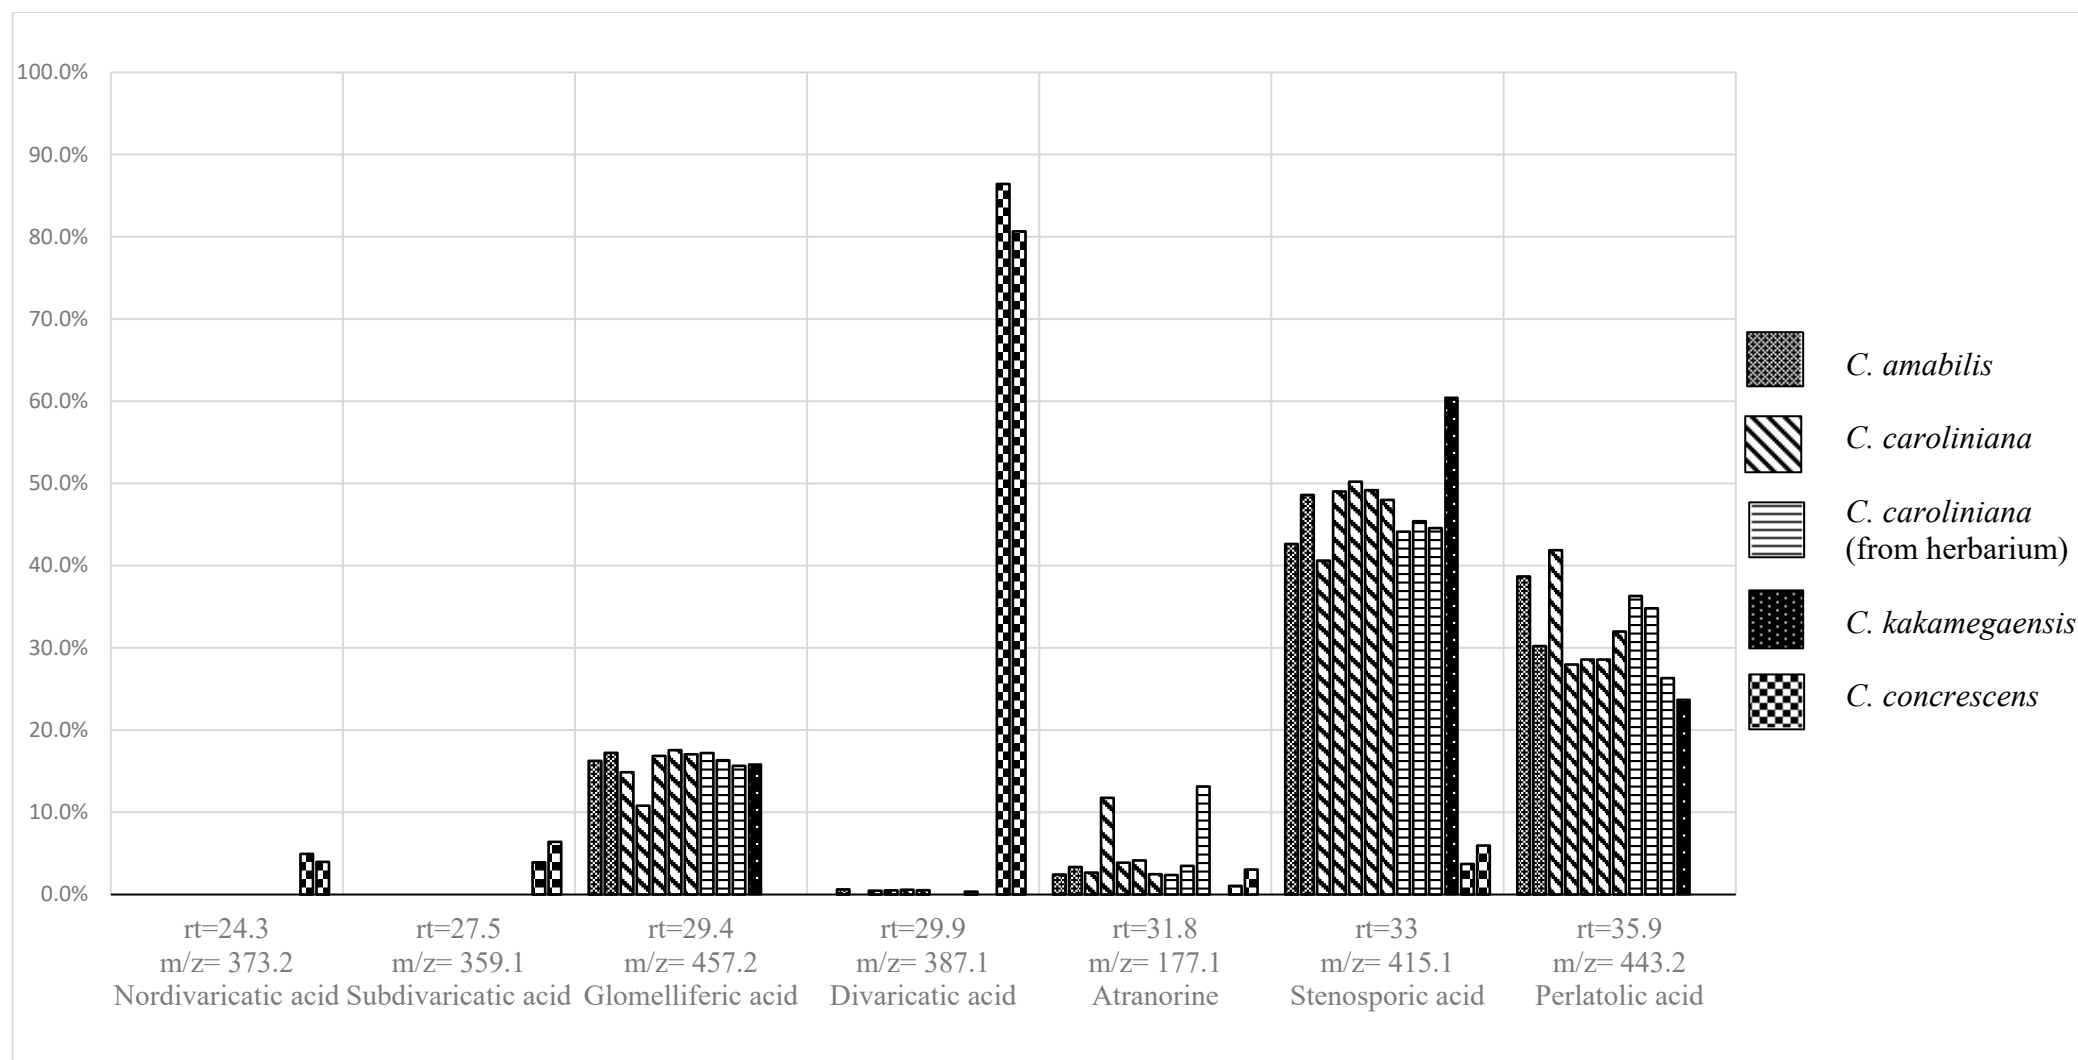

Figure S1. HPLC features (rt, m/z) of the major detected metabolites with their relative amounts in the 13 sample thalli analyzed (% calculated from 254 nm absorbances)
