# Supplementary material for: A New Cryptic Lineage in Parmeliaceae (Ascomycota) with Pharmacological Properties
Source: MDPI journal article supplement (doi:10.3390/jof8080826), 2022-08-08
Supplement: s1 [file s1]

Table S3. IC<sub>50</sub> (µg/mL) values of MCF-7 and HepG2 cells after 24 h incubation with the methanol extracts of *Canoparmelia kakamegaensis* and *Canoparmelia caroliniana*. Values are expressed as mean ± standard deviation. \*Indicates statistically significant differences ( $p < 0.05$ ) between lichen extracts.

| Extracts                          | IC <sub>50</sub> values (µg/mL) |             |
|-----------------------------------|---------------------------------|-------------|
|                                   | MCF-7 cells                     | HepG2 cells |
| <i>Canoparmelia kakamegaensis</i> | *38.2 ± 3.4                     | *34.3 ± 5.1 |
| <i>Canoparmelia caroliniana</i>   | 43.3 ± 3.5                      | 45.3 ± 3.0  |
